1 **Systemic Inflammation Mediates the Relationship between Obesity and Health**  
2 **Related Quality of Life**

3

4 **Jeffrey Wilkins\***

5 Biomedical Biotechnology Research Institute, North Carolina Central University, 1801 Fayetteville  
6 Street, NC 27707, USA  
7 *[jwilki16@nccu.edu](mailto:jwilki16@nccu.edu)*

8

9 **Palash Ghosh\***

10 Centre for Quantitative Medicine, Duke-NUS Medical School, 8 College Road, Singapore 169857  
11 *[palash.ghosh@duke-nus.edu.sg](mailto:palash.ghosh@duke-nus.edu.sg)*

12

13 **Juan Vivar**

14 Center for Tobacco Products, Food and Drug Administration, 10903 New Hampshire Avenue, Silver  
15 Spring, MD 20993, USA  
16 *[jcvivar@gmail.com](mailto:jcvivar@gmail.com)*

17

18 **Bibhas Chakraborty**

19 Centre for Quantitative Medicine, Duke-NUS Medical School, 8 College Road, Singapore 169857  
20 *[bibhas.chakraborty@duke-nus.edu.sg](mailto:bibhas.chakraborty@duke-nus.edu.sg)*

21

22 **Sujoy Ghosh<sup>+</sup>**

23 Program in Cardiovascular & Metabolic Disorders & Centre for Computational Biology, Duke-NUS  
24 Medical School, 8 College Road, Singapore 169857  
25 *[sujoy.ghosh@duke-nus.edu.sg](mailto:sujoy.ghosh@duke-nus.edu.sg)*

26

27 **\*: These authors contributed equally to this work.**

28 **+: corresponding author**

29

30

31

32

33

34

## 35 **ABSTRACT**

36 **Background:** At the population level, obesity has been reported to be positively associated with low-  
37 level chronic inflammation, and negatively associated with several indices of health-related quality of  
38 life (HRQOL). It is however not clear if obesity-associated inflammation is partly responsible for the  
39 observed negative associations between obesity and HRQOL. The present study investigates this  
40 question by testing the hypothesis that systemic inflammation is a mediator of the observed association  
41 between obesity and a specific HRQOL index called “healthy days”, as measured via a subset of the  
42 CDC HRQOL-4 questionnaire.

43 **Methods:** Demographic, body mass index (BMI), C-reactive protein (CRP), inflammatory disease  
44 status, medication use, smoking, and HRQOL data were obtained from NHANES (2005-2008) and  
45 analyzed using sampling-weighted generalized linear models. Both main effects and interaction effects  
46 were analyzed to evaluate possible mediator-outcome confounding. Model robustness was tested via  
47 sensitivity analysis. Prior to model development, data was subjected to multiple imputation in order to  
48 mitigate information loss from survey non-response. Averaged results from the imputed datasets were  
49 reported in the form of odds ratios (OR) and confidence intervals (CI).

50 **Results:** Obesity (BMI >30kg/m<sup>2</sup>) was positively associated with poor physical healthy days (OR: 1.59,  
51 95% CI: 1.15-2.21) in unadjusted models. ‘Elevated’ and ‘clinically raised’ levels of the inflammation  
52 marker CRP were also positively associated with poor physical healthy days (OR= 1.61, 95% CI: 1.23-  
53 2.12, and OR= 2.45, 95% CI: 1.84-3.26, respectively); additionally ‘clinically raised’ CRP was  
54 positively associated with mental unhealthy days (OR= 1.66, 95% CI: 1.26-2.19). The association  
55 between obesity and physical HRQOL was rendered non-significant in models including CRP.  
56 Association between ‘elevated’ and ‘clinically raised’ CRP and physical unhealthy days remained  
57 significant even after adjustment for obesity or inflammation-modulating covariates (OR= 1.36, 95%  
58 CI :1.02-1.82, and OR= 1.75, 95% CI: 1.21-2.54, respectively).

59 **Conclusions:** Systemic inflammation is a significant mediator of the association between obesity and  
60 physical unhealthy days. and is also an independent determinant of physical and mental unhealthy days.  
61 Importantly, elevated inflammation below the clinical threshold is also negatively associated with  
62 physical healthy days and may warrant more attention from a population health perspective than  
63 currently appreciated.

64

65 **Keywords:** Obesity, inflammation, healthy days, health-related quality of life, mediation

66

67

68

69

70

71

72

73

74

75

76

77

78

79

80

81

82

## 83 **BACKGROUND**

84 Inflammation is a necessary component of host defenses against infections and injury, but can  
85 also contribute to the pathophysiology of several chronic diseases [1, 2]. Chronic systemic  
86 inflammation provides a unifying pathological mechanism for many seemingly unrelated diseases  
87 including arthritis, asthma, atherosclerosis, diabetes, congestive heart failure, Crohn's disease,  
88 Alzheimer's disease and several forms of cancers [3]. Extensive research also points to a strong  
89 association between inflammation and obesity, a global epidemic and clear public health concern [4-6].  
90 Obesity (body mass index,  $BMI \geq 30 \text{kg/m}^2$ ) is often co-extant with low-level chronic inflammation that  
91 is reflected in elevated levels of circulating CRP [7, 8]. Obesity-associated inflammation leads to  
92 insulin resistance, endothelial dysfunction, and eventually, a significant elevation of cardio-metabolic  
93 disease risk [9, 10].

94 From a population health perspective, effective interventions and optimized predictions for  
95 future health-care costs require a better quantitative understanding of chronic conditions such as  
96 inflammation and obesity and their relationship to indices of public health. One index that captures the  
97 population level effects of chronic conditions is the health related quality of life (HRQOL) [11].  
98 HRQOL, a self-reported measure of physical and mental functioning and well-being, is increasingly  
99 used to assess the effects of chronic illness, treatments, and short- and long-term disabilities.

100 Previous studies have generally demonstrated a negative correlation between excess adiposity  
101 and HRQOL in different populations [12-16]. Much less is known, however, on the effects of chronic  
102 inflammation on HRQOL, and whether inflammation can mediate the association between obesity and  
103 HRQOL. Studies investigating inflammation and HRQOL have either focused on small cohorts  
104 targeting specific inflammatory disorders [17-19] or interrogated inflammation and HRQOL as separate  
105 endpoints. Here we perform a mediation analysis, including potential mediator-outcome confounder  
106 analysis [20], to examine the relationship between systemic inflammation, obesity and the HRQOL

107 measures of physical and mental healthy days (based on the CDC HRQOL-4 questionnaire), from  
108 survey data derived from the National Health and Nutrition Examination Survey, (NHANES) 2005-  
109 2008. Our findings point to new insights involving obesity, inflammation and HRQOL, with potentially  
110 important implications for public health.

## 111 **METHODS**

112

### 113 **Study design and Participants**

114 For this cross-sectional study, data was downloaded from the National Health and Nutrition  
115 Examination Survey (NHANES) collection (years 2005 through 2008,  
116 [http://www.cdc.gov/nchs/nhanes/nhanes\\_questionnaires.htm](http://www.cdc.gov/nchs/nhanes/nhanes_questionnaires.htm)). NHANES is conducted by the Center for  
117 Disease Control's National Center for Health Statistics (CDC-NCHS) to assess the health and  
118 nutritional status of a representative civilian, non-institutionalized US population using a multistage,  
119 stratified, clustered probability design [21]. Data for the variables of interest were available for a total  
120 of 6325 adults (aged 20-75 years,  $BMI \geq 18.5 \text{ kg/m}^2$ ) and included missing values. Data collected  
121 included demographic information, health-related questionnaire, and laboratory data on C-reactive  
122 protein (CRP, a marker of systemic inflammation). Data for confounding factors that can influence  
123 inflammation status and HRQOL outcomes such as relevant medical conditions (asthma, arthritis, heart  
124 disease, and cancer), anti-inflammatory/analgesic medication, and lifestyle choice (smoking) were also  
125 downloaded for statistical modeling. To account for the complexity of survey design including  
126 oversampling, survey non-response, or post-stratification issues, NHANES assigns sample 'weights'  
127 were also downloaded (additional details available from  
128 <https://www.cdc.gov/nchs/tutorials/nhanes/SurveyDesign/Weighting/OverviewKey.htm>, and in  
129 **Supplementary Text 1**).

### 130 **Health related quality of life (HRQOL) measures**

131 Quality of life was assessed by using a subset of the CDC HRQOL-4 questionnaire, developed  
132 to assess physical and mental health in the general U.S population [22, 23]. The HRQOL-4  
133 questionnaire (**Supplementary Text 2**) uses self-reported measures of healthy and unhealthy days as  
134 indicators of HRQOL, and have undergone cognitive testing and criterion validity with the Short-Form  
135 36, content and construct validity, predictive validity, internal consistency, test-retest reliability, and  
136 measurement invariance in persons with and without disability [24, 25]. The core Healthy Days  
137 consists of four questions focusing on the participant's general health status (Question-1), number of  
138 physical unhealthy days in the 30 days preceding the survey (Question-2), number of mental unhealthy  
139 days in the 30 days preceding the survey (Question- 3), and number of days with activity limitations in  
140 the 30 days preceding the survey (Question-4). Question-1 is a predictor of mortality and chronic  
141 disease conditions [26], questions -2 and -3 assess recent physical symptoms and mental or emotional  
142 distress, respectively, and question- 4 measures perceived disability and lost productivity [23]. Only  
143 responses to survey Questions-2 and -3 were used in the current study since the focus of the analysis  
144 was to determine effects specifically on physical and mental health. Throughout this analysis, an  
145 *increase* in the number of physical/mental unhealthy days has been used to indicate poorer health  
146 outcomes.

#### 147 **Coding of variables**

148 Participants were divided into 3 categories by age (class 1, 20-44 yrs.; class 2, 45-65 yrs.; class  
149 3 >65 yrs.) and categorized by race/ethnicity as Mexican-American (1), Other Hispanic (2), Non-  
150 Hispanic White (3), Non-Hispanic Black (4), and Other (5). Obesity was measured by body mass index  
151 (BMI) based on self-reported weight in kilograms divided by measured height in meters-square.  
152 Respondents were broadly categorized into 3 BMI groups: normal weight (BMI 18.5-24.9), overweight  
153 (BMI 25-29.9), and obese (BMI $\geq$ 30). Systemic inflammation was measured via blood CRP levels  
154 (mg/dl) and grouped into 3 classes according to Visser et al. [8] – Class 1('non-elevated CRP',

155 <0.22mg/dl), Class 2 ('elevated CRP',  $\geq 0.22$  and  $< 1.0$  mg/dl) and Class 3 ('clinically raised CRP';  $\geq 1.0$   
156 mg/dl), respectively. Each medical condition, including asthma (MCQ010), arthritis (MCQ160A),  
157 cancer (MCQ220), or any heart disease (a composite variable derived from a positive diagnosis of any  
158 one of congestive heart failure (MCQ160B), coronary heart disease (MCQ160C), or heart attack  
159 (MCQ160E)) were dichotomized into '0' and '1' categories where '1' indicates a positive response to  
160 the question of whether there ever was a diagnosis of the relevant condition by a doctor or healthcare  
161 professional. Smoking status was also dichotomized, with '1' assigned to individuals who are current  
162 smokers. The use of common analgesic and anti-inflammatory medications (aspirin, acetaminophen,  
163 ibuprofen and naproxen) was also recorded with '1' indicating use of drug and '0' otherwise. Although  
164 acetaminophen is more widely prescribed as an analgesic and antipyretic, previous studies have  
165 reported effectiveness of acetaminophen against lower grade inflammation [27] and acetaminophen  
166 overdose has also been shown to reduce circulating CRP levels [28]. Based on these findings, and the  
167 close association between inflammation and physical pain, we included the use of acetaminophen in the  
168 analysis. For logistic regression analysis, each outcome variable (HRQOL measures) was dichotomized  
169 into  $\leq 15$  or  $> 15$  days of poor physical (HSQ470) or mental health (HSQ480) with  $> 15$  unhealthy days  
170 denoted by 1, and 0 otherwise.

## 171 **Statistical Analysis**

172 All statistical analysis was conducted using SAS, version 9.1 (SAS Institute Inc., Cary, NC,  
173 USA) or R (version x64 3.2.3). Data was analyzed using sampling weighted generalized linear models.  
174 Both unadjusted and adjusted models linking BMI and CRP to the outcome variables (HSQ470 and  
175 HSQ480) were constructed, with adjustments for possible inflammation-regulating medical conditions  
176 (asthma, arthritis, heart disease, and cancer), use of over the counter anti-inflammatory/pain  
177 medications (acetaminophen, aspirin, ibuprofen and naproxen), and lifestyle (current cigarette smoking  
178 status). As several of the surveyed variables contained missing values, any attempt to analyze only

179 complete cases severely reduced the total number of observations, leading to potentially biased  
180 estimates. To circumvent this problem, we used multiple imputation [29] to estimate probable value  
181 ranges for incomplete observations. The original coding for the missing values included bona-fide  
182 missing values, plus other types of non-response such as “don’t know” (1517 total instances), and  
183 “refused to answer” (2 total instances). We converted all missing and non-response cases into missing  
184 values, as recommended by the NHANES analytical guidelines [30]. Five imputed datasets were  
185 generated according to multiple imputation procedures described by Rubin [29]. Each of these  
186 “completed” datasets were individually analyzed using sampling weighted generalized linear models  
187 (GLM), via the *survey* package in R [31]. For each of the imputed datasets,  $m = 1 \dots 5$ , we obtained the  
188 estimate of regression coefficient as  $\beta_m$  along with the standard error  $s_m$ . The overall estimate was  
189 obtained by averaging the individual estimates from the imputed datasets as

$$191 \quad \hat{\beta} = \frac{1}{M} \sum_{m=1}^M \hat{\beta}_m$$

190 The estimated variance for  $\hat{\beta}$  is given by

$$192 \quad V(b) = W + \left(1 + \frac{1}{M}\right) B,$$

$$193 \quad \text{where } W = \frac{1}{M} \sum_{m=1}^M s_m^2, \text{ and } B = \frac{1}{M-1} \sum_{m=1}^M (\hat{\beta}_m - \hat{\beta})^2 \text{ }^{33}.$$

194  
195 Due to the difficulties in combining and interpreting the combined p-values arising from the above  
196 analysis, we have chosen to report results in terms of the estimated odds ratio ( $e^{\hat{\beta}}$ ) and their 95%  
197 confidence interval for all analysis. The odds ratios (OR) were obtained by exponentiation of the  
198 average regression coefficient,  $\hat{\beta}$ .

199

## 200 **RESULTS**



## 201 **Participants**

202 Data for subjects 18-20 years of age were excluded due to the large excess of missing values in  
203 this group and to prevent complications from differential growth patterns in childhood and adolescence  
204 where the usual BMI categories do not apply [32]. The general characteristics of the survey  
205 respondents are listed in **Table 1**. The average age of the sampled population was 51.3 years ( $\pm 17.85$   
206 years), with approximately 49% male subjects. The mean physical and mental unhealthy days reported  
207 was 4.49( $\pm 8.71$ ) and 4.09 ( $\pm 8.28$ ) days, respectively. The average BMI was 29.34( $\pm 6.77$ ) kg/m<sup>2</sup>, with  
208 approximately 27% normal-weight, 35% overweight, and 38% obese subjects. The mean CRP level  
209 was 0.46( $\pm 0.89$ ) mg/dl, with approximately 51% ‘normal’, 37% ‘elevated’ and 11% ‘clinically raised’  
210 categories. Approximately 22% of the subjects were current smokers (SMQ040), whereas nearly 14%  
211 had a diagnosis of asthma (MCQ010). Similar medical diagnosis for arthritis (MCQ160A) and  
212 cancer/malignancy (MCQ220) were 32% and 10%, respectively. Approximately 9.5% of the population  
213 was positive for “any heart disease”. Finally, nearly 14% of the subjects reported using one or more of  
214 the analgesic/ anti-inflammatory medications.

215

## 216 **Relationship between body mass index and C-reactive protein**

217 Quantile-quantile plots demonstrated that CRP and BMI values were better approximated to the  
218 normal distribution after log transformation (data not shown). We carried out linear regression to  
219 determine the association between CRP levels and BMI. Taking log CRP as the dependent variable and  
220 log BMI as the predictor variable, the regression coefficient of BMI was 2.69 (95%CI: 2.50, 2.88)  
221 (**Supplementary Table 1**), indicating a statistically significant association between BMI and CRP in  
222 the study population.

223

224 **Relationship of body mass index (BMI) and C-reactive protein (CRP) to physical and mental**  
225 **healthy days**

226 Considering physical unhealthy days (HSQ470) as a binary response, we performed logistic  
227 regression with BMI groups (normal, overweight and obese) (normal group as reference) (**Table 2,**  
228 **model 1**). The estimated odds ratio for overweight subjects was 1.06 (95% CI: 0.76, 1.47) and that for  
229 obese subjects was 1.59 (95% CI: 1.15, 2.21). Thus, compared to a normal-weight person, an  
230 overweight person ( $25 \leq \text{BMI} \leq 29.9$ ) was 1.06 times more likely, and an obese person ( $\text{BMI} \geq 30$ ) 1.59  
231 times more likely to experience >15 physical unhealthy days in a month. Only the estimated OR for the  
232 obese, but not overweight, individuals were statistically significant (95% CI excluded 1). In contrast,  
233 neither overweight nor obese individuals were significantly associated to mental unhealthy days (95%  
234 CI includes 1) (**Table 2, model 2**).

235 To further assess the relationship between the obesity class and physical/mental unhealthy days,  
236 we focused only on obese subjects ( $\text{BMI} \geq 30$ ), divided into 5 subclasses according to increasing values  
237 of BMI (**Supplementary Tables 2 and 3**). Subjects in the two highest classes of obesity (class IV, BMI  
238 50.0-59.9 and class V,  $\text{BMI} \geq 60$ ) were found to be significantly associated to physical unhealthy days,  
239 compared to baseline (class I obesity, BMI 30.0-34.9). Only class V obesity subgroup was found to be  
240 significantly associated to HSQ480, with higher BMI associated with a reduced probability for mental  
241 unhealthy days. Although this finding is counterintuitive, we note that the statistical estimates may be  
242 unstable due to the very low subject numbers in this group (15 individuals, < 1% of total  $\text{BMI} \geq 30$   
243 population).

244 Next, we assessed the relationship between plasma CRP levels (with CRP.Class 1 as reference)  
245 and the number of physical unhealthy days (**Table 2, model 3**). The estimated OR of CRP.Class (2)  
246 was 1.61 (95% CI: 1.23, 2.12) and that of CRP.Class (3) was 2.45 (95% CI: 1.84, 3.26), suggesting  
247 statistically significant associations for both CRP categories. The association between CRP.Class(2) to

248 mental unhealthy days (HSQ480) was not significant (OR=1.05, 95% CI: 0.79, 1.40); however,  
249 CRP.Class(3) was significantly associated to mental unhealthy days, (OR=1.66, 95% CI: 1.26, 2.19)  
250 **(Table 2, model 4).**

251 We next modeled both BMI groups and CRP.Class as explanatory variables to ascertain their  
252 relative contribution to physical unhealthy days. The estimated odds ratios were 0.98 and 1.26 for  
253 overweight and obese BMI groups, respectively, and, 1.51 and 2.21 for CRP.Class(2) and  
254 CRP.Class(3), respectively **(Table 2, model 5)**. However, both the 95% CIs corresponding to the  
255 overweight (95% CI: 0.70, 1.35) and obese group (95% CI: 0.92, 1.74) now included 1, whereas the  
256 corresponding CIs for CRP.Class(2) (95% CI: 1.14, 2.00) and CRP.Class(3) (95% CI: 1.55, 3.16)  
257 excluded 1. In other words, when both CRP and BMI are included as explanatory variables in the same  
258 model, the significant associations observed earlier between BMI level and physical unhealthy days  
259 was no longer present, suggesting systemic inflammation as mediating the effect **(Figure 1)**.

260

### 261 **Effect modification analysis:**

262 We carried out an effect modification analysis on the relationship of HSQ470 with BMI and  
263 CRP by including gender, age-class and race in the models. The interaction effects between  
264 'overweight and gender' and 'obese and gender' were significant **(Table 3)**. For example, within the  
265 overweight category, a male was 0.42 times less likely to experience >15 physical unhealthy days  
266 compared to a female. All other interactions were non-significant. For HSQ480 (mental unhealthy  
267 days), we observed significant interaction effects due to 'obese and gender'; 'CRP.class(3) and  
268 gender'; 'overweight and Ageclass(2)'; 'obese and Ageclass(2)'; 'CRP.class(3) and Ageclass(2)';  
269 'CRP.class(3) and Ageclass(3)', and, 'overweight and Race-5' **(Supplementary Table 4)**. All other  
270 interactions effects were non-significant. These results suggest that the observed association between  
271 adiposity or CRP and physical/mental healthy days are modifiable to some extent by age and gender.

272 The apparent modification of the association between overweight and HSQ480 by Race-5 has to be  
273 interpreted with caution due to the very low numbers of subjects belonging to this category (<5% of the  
274 surveyed population, **Table 1**).

275

### 276 **Sensitivity analysis**

277 We performed sensitivity analysis on the relationship of HSQ470 to BMI groups and CRP  
278 classes respectively, by varying the cut-off value for HSQ470=1 from 15 to 12, 13, 14, 16, 17 and 18  
279 days. The obese class was significantly associated to HSQ470 for all the cut-off values tested with  
280 relatively stable odds ratio estimates (**Table 4**). On the other hand, the odds-ratios for overweight were  
281 non-significant for all HSQ470 cut-off values tested, consistent with the original findings. Similarly,  
282 the odds-ratios corresponding to the different CRP classes (2 and 3) with different HSQ470 cut-off  
283 values were significant, agreeing again with the primary results (HSQ470 cut-off value=15). These  
284 results suggest that the identified associations between BMI or CRP and HRQOL are robust to the  
285 threshold used for defining physical unhealthy days.

286

### 287 **Relationship of CRP to physical and mental unhealthy days after adjustment for other sources of** 288 **inflammation**

289 We next investigated whether the effects of CRP classes on physical unhealthy days could be  
290 confounded by some of the most common sources of inflammation encountered in the study population  
291 (mediator outcome confounding). We carried out multivariable logistic regression analysis by including  
292 demographics (age, gender), pro-inflammatory medical conditions, use of common anti-  
293 inflammatory/pain medications, and current smoking status, in addition to CRP and BMI categories in  
294 the model (**Table 5**). The CRP.Class variable remained significantly associated to physical unhealthy  
295 days, for both the CRP.Class (2) (OR=1.36, 95% CI: 1.02, 1.82) and CRP.Class (3) (OR=1.75, 95%

296 CI:1.21, 2.54), even after adjustment. A similar analysis against mental unhealthy days showed the  
297 association of CRP classes and BMI groups to be non-significant, although significant associations  
298 were observed for presence of asthma, presence of arthritis, current smoking status, occurrence of any  
299 heart disease and gender (**Supplementary Table 5**).

300

## 301 **DISCUSSION**

302 The present study was undertaken to better define the relationship between obesity, systemic  
303 inflammation and measures of HRQOL. We used data from a US population based survey (NHANES  
304 2005-2008) to estimate effects of increasing body mass and increasing inflammation on the number of  
305 physical and mental unhealthy days reported by participants, in a mediation framework (**Figure 1**). We  
306 also tested the impact of common inflammation regulators (inflammatory disease, anti-inflammatory  
307 drug use, and smoking) on the association between the inflammation marker CRP, and HRQOL (based  
308 on the CDC HRQOL-4 questionnaire). Compared to the more detailed Medical Outcomes Study Short  
309 Form 36 (SF-36), the CDC's "healthy days" serves as a simple proxy measure of HRQOL. It measures  
310 perceptions of physical and mental health using one question each, eliminating the need for complex  
311 weighting factors to calculate summary scores.

312 In previous studies, Hassan et al. [13] assessed a US-based sample with the CDC-HRQOL-4  
313 and reported greater likelihood of poor physical and mental quality of life in participants with obesity.  
314 Renzaho et al. [15] sampled an Australian population with SF-36 and found that physical, but not  
315 mental, QoL scores were negatively associated with BMI. Serrano-Aguilar et al. [16] analyzed a  
316 European sample using the EuroQol-5d assessment and found that participants with BMI $\geq$ 40 had lower  
317 HRQOL scores than normal weight participants. These findings agree with the positive association  
318 between BMI and number of physical unhealthy days observed in the current study in unadjusted  
319 models, and also support the lack of association between BMI and mental unhealthy days[15].

320 Importantly however, the association between BMI and physical HRQOL was non-significant after  
321 systemic inflammation (CRP levels) was included as a mediator (**Table 2, model 5**), or other variables  
322 that contribute towards such inflammation (**Table 5**). A summary of the major findings s presented via  
323 the directed acyclic graph [33] in **Figure 1**. We speculate that the observed earlier associations  
324 between BMI and HRQOL could be mediated by the chronic inflammation that co-exists in obese  
325 subjects. However, methodological differences between the current study and previously published  
326 reports should also be noted. While our study used the number of healthy days as the QoL metric,  
327 previous studies utilized composite HRQOL measures, based on a summation over several sub-domain  
328 scores. Additionally, differences in the sampled populations between the studies could also potentially  
329 influence the current findings. The cross-sectional design of the current study further limits the ability  
330 to infer causal relationships, e.g. one cannot distinguish if inflammation causally affected HRQOL, or  
331 if HRQOL was affected by some other factors that also led to inflammation. Finally, since the  
332 assessment by CDC HRQOL-4 is based on self-reporting, the study results are also potentially  
333 susceptible to the risk of recall error and misreport.

334 A second significant finding from the current study is that systemic CRP levels are positively  
335 and significantly associated with the number of physical and mental, unhealthy days, even after  
336 adjustments for sex, age, pro-inflammatory co-morbidities, and anti-inflammatory/analgesic drug use.  
337 The observation that even sub-clinical CRP levels affect HRQoL may have important consequences for  
338 public health. Visser et al. [8] introduced the classification scheme of sub-clinical ‘elevated CRP ( $\geq 0.22$   
339 mg/dl )’ and ‘clinically raised CRP ( $\geq 1.0$  mg/dl)’ and identified an association of the former with  
340 overweight and obesity. In other studies, sub-clinical CRP has been associated with increased risk of  
341 cardiovascular disease-related mortality in healthy subjects [34].

342

343 **CONCLUSION**

344 In conclusion, a population-based mediation analysis investigating the roles of obesity and  
345 systemic inflammation on indices of health-related quality of life suggests inflammation as a strong  
346 mediator of the negative associations between body mass index and the number of reported physical  
347 healthy days. Our findings further suggest that sub-clinical inflammation is possibly also an  
348 independent predictor of quality of life domains in the general population. In light of these  
349 observations, the relationship of systemic inflammation to patient's health may need to be re-assessed  
350 and a distinction made between very high CRP levels due to acute events, and lower (but possibly  
351 chronic) elevations in CRP that can still significantly affect health related quality of life, and therefore  
352 should be targeted for clinical management.

353

## 354 **FIGURE LEGEND**

355 **Figure 1. Effect of adjusting for inflammation on the estimate of obesity-physical unhealthy days**  
356 **association in NHANES subjects.** The 'direct effect' estimates the odds ratio (and confidence  
357 intervals) for the association of adult obese subjects to the number of physical unhealthy days, a  
358 measure of HRQOL. The 'indirect effect' estimates the same association following the inclusion of  
359 clinically raised systemic inflammation (measured as C-reactive protein) as a possible mediator. The  
360 direct associations of obesity to inflammation and of inflammation to physical unhealthy days are also  
361 shown.

362

## 363 **ABBREVIATIONS**

364 BMI – Body Mass Index

365 CRP – C-reactive protein

366 HRQOL – Health Related Quality of Life

367 HSQ470 – Health Status Questionnaire 470

368 HSQ480 – Health Status Questionnaire480

369 NHANES – National Health and Nutrition Examination Survey

370

## 371 **DECLARATIONS**

372 **Ethics approval and consent to participate:** The sample in the current study included adults aged 20  
373 to 75 years, with BMI $\geq$ 18.5 kg/m<sup>2</sup>, who completed the examination component in 2005–2006 or 2007–  
374 2008. The NHANES surveys are subject to CDC-NCHS Ethics Review Board to ensure appropriate  
375 human subject protections, in compliance with 45 Code of Federal Regulations, part 46 [35].

376 **Consent for publication:** Not applicable

377 **Availability of data and materials:** The datasets used and/or analyzed during the current study are  
378 available from the corresponding author on reasonable request. The original NHANES data is freely  
379 available from <https://www.cdc.gov/nchs/nhanes/index.htm>

380 **Competing interests:** The authors declare that they have no competing interests.

381 **Funding:** This work was supported by a NCCU-BBRI fellowship to JW and funding from the National  
382 Institutes of Health (HL059868, MD000175 and DK088319), American Heart Association  
383 (AHA10SDG4230068) National Medical Research Council, Ministry of Health, Singapore (WBS  
384 R913200076263) to SG; funding from the Duke-NUS Medical School, Singapore, to BC.

385 **Author contributions:** **JW** (acquisition and interpretation of data, writing of manuscript); **PG**  
386 (analysis of data, writing of manuscript); **JV** (analysis of data); **BC** (interpretation of data, review of  
387 statistical analysis); **SG** (conception and supervision of study, interpretation of data, writing of  
388 manuscript)

389 **Acknowledgements:** The authors thank Drs. Jonathan Livingston, Dwayne Brandon and Sandra  
390 Waters from the Department of Psychology, North Carolina Central University, for helpful discussions  
391 and suggestions during the design and analysis of the study. The authors also thank Mr. Lavonza  
392 Holliman for his assistance with the initial literature review.



## 393 REFERENCES

- 394 1. Libby P: **Role of inflammation in atherosclerosis associated with rheumatoid arthritis.** *The*  
395 *American Journal of Medicine* 2008, **121**(10 Suppl 1):S21-31.
- 396 2. Tabas I, Glass CK: **Anti-inflammatory therapy in chronic disease: challenges and**  
397 **opportunities.** *Science* 2013, **339**(6116):166-172.
- 398 3. Ward PA: **Cytokines, inflammation, and autoimmune diseases.** *Hospital practice* 1995,  
399 **30**(5):35-41.
- 400 4. Tsai AG, Williamson DF, Glick HA: **Direct medical cost of overweight and obesity in the**  
401 **USA: a quantitative systematic review.** *Obes Rev* 2011, **12**(1):50-61.
- 402 5. Kaaks R, Kuhn T: **Epidemiology: Obesity and cancer-the evidence is fattening up.** *Nat Rev*  
403 *Endocrinol* 2014, **10**(11):644-645.
- 404 6. Flegal KM, Carroll MD, Ogden CL, Curtin LR: **Prevalence and trends in obesity among US**  
405 **adults, 1999-2008.** *JAMA* 2010, **303**(3):235-241.
- 406 7. Greenfield JR, Samaras K, Jenkins AB, Kelly PJ, Spector TD, Gallimore JR, Pepys MB,  
407 Campbell LV: **Obesity is an important determinant of baseline serum C-reactive protein**  
408 **concentration in monozygotic twins, independent of genetic influences.** *Circulation* 2004,  
409 **109**(24):3022-3028.
- 410 8. Visser M, Bouter LM, McQuillan GM, Wener MH, Harris TB: **Elevated C-reactive protein**  
411 **levels in overweight and obese adults.** *JAMA* 1999, **282**:2131-2135.
- 412 9. Lumeng CN, Saltiel AR: **Inflammatory links between obesity and metabolic disease.** *J Clin*  
413 *Invest* 2011, **121**(6):2111-2117.
- 414 10. Yudkin JS, Stehouwer CD, Emeis JJ, Coppack SW: **C-reactive protein in healthy subjects:**  
415 **associations with obesity, insulin resistance, and endothelial dysfunction: a potential role**  
416 **for cytokines originating from adipose tissue?** *Arteriosclerosis, thrombosis, and vascular*  
417 *biology* 1999, **19**(4):972-978.
- 418 11. McHorney CA: **Health status assessment methods for adults: past accomplishments and**  
419 **future challenges.** *Annu Rev Public Health* 1999, **20**:309-335.
- 420 12. Doll HA, Petersen SE, Stewart-Brown SL: **Obesity and physical and emotional well-being:**  
421 **associations between body mass index, chronic illness, and the physical and mental**  
422 **components of the SF-36 questionnaire.** *Obesity research* 2000, **8**(2):160-170.
- 423 13. Hassan MK, Joshi AV, Madhavan SS, Amonkar MM: **Obesity and health-related quality of**  
424 **life: a cross-sectional analysis of the US population.** *International journal of obesity and*  
425 *related metabolic disorders : journal of the International Association for the Study of Obesity*  
426 2003, **27**(10):1227-1232.
- 427 14. Jia H, Lubetkin EI: **The impact of obesity on health-related quality-of-life in the general**  
428 **adult US population.** *J Public Health (Oxf)* 2005, **27**(2):156-164.
- 429 15. Renzaho A, Wooden M, Houg B: **Associations between body mass index and health-related**  
430 **quality of life among Australian adults.** *Qual Life Res* 2010, **19**(4):515-520.
- 431 16. Serrano-Aguilar P, Munoz-Navarro SR, Ramallo-Farina Y, Trujillo-Martin MM: **Obesity and**  
432 **health related quality of life in the general adult population of the Canary Islands.** *Qual*  
433 *Life Res* 2009, **18**(2):171-177.
- 434 17. Courtney JM, Kelly MG, Watt A, Garske L, Bradley J, Ennis M, Elborn JS: **Quality of life and**  
435 **inflammation in exacerbations of bronchiectasis.** *Chron Respir Dis* 2008, **5**(3):161-168.
- 436 18. Ehlers PO, Sundblad BM, Larsson K: **Effect of fluticasone on markers of inflammation and**  
437 **quality of life in steroid-naive patients with mild asthma.** *Clin Respir J* 2010, **4**(1):51-58.

- 438 19. Farag YM, Keithi-Reddy SR, Mittal BV, Surana SP, Addabbo F, Goligorsky MS, Singh AK:  
439 **Anemia, inflammation and health-related quality of life in chronic kidney disease patients.**  
440 *Clin Nephrol* 2011, **75**(6):524-533.
- 441 20. Richiardi L, Bellocco R, Zugna D: **Mediation analysis in epidemiology: methods,**  
442 **interpretation and bias.** *Int J Epidemiol* 2013, **42**(5):1511-1519.
- 443 21. Centers for Disease Control and Prevention (CDC) NCHS: **National Health and Nutrition**  
444 **Examination Survey Data.** Hyattsville, MD: U.S. Department of Health and Human  
445 **Services, Centers for Disease Control and Prevention (2005-2008)**  
446 **(<http://www.cdc.gov/nchs/nhanes.htm>).** In.
- 447 22. Ford ES, Li C: **Metabolic syndrome and health-related quality of life among U.S. adults.**  
448 *Annals of epidemiology* 2008, **18**(3):165-171.
- 449 23. Hennessy CH, Moriarty DG, Zack MM, Scherr PA, Brackbill R: **Measuring health-related**  
450 **quality of life for public health surveillance.** *Public Health Rep* 1994, **109**(5):665-672.
- 451 24. Mielenz T, Jackson E, Currey S, DeVellis R, Callahan LF: **Psychometric properties of the**  
452 **Centers for Disease Control and Prevention Health-Related Quality of Life (CDC**  
453 **HRQOL) items in adults with arthritis.** *Health and quality of life outcomes* 2006, **4**:66.
- 454 25. Newschaffer CJ: **Validation of Behavioral Risk Factor Surveillance System (BRFSS)**  
455 **HRQOL measures in a statewide sample.** . In. Edited by Prevention CfDca. Atlanta; 1998.
- 456 26. Idler EL, Benyamini Y: **Self-rated health and mortality: a review of twenty-seven**  
457 **community studies.** *J Health Soc Behav* 1997, **38**(1):21-37.
- 458 27. Graham GG, Davies MJ, Day RO, Mohamudally A, Scott KF: **The modern pharmacology of**  
459 **paracetamol: therapeutic actions, mechanism of action, metabolism, toxicity and recent**  
460 **pharmacological findings.** *Inflammopharmacology* 2013, **21**(3):201-232.
- 461 28. Craig DG, Lee P, Pryde EA, Walker SW, Beckett GJ, Hayes PC, Simpson KJ: **Elevated levels**  
462 **of the long pentraxin 3 in paracetamol-induced human acute liver injury.** *European journal*  
463 *of gastroenterology & hepatology* 2013, **25**(3):359-367.
- 464 29. Rubin DB: **Formalizing Subjective Notions About the Effect of Nonrespondents in Sample**  
465 **Surveys.** *Journal of the American Statistical Association* 1977, **72**:538-543.
- 466 30. Johnson CL, Paulose-Ram R, Ogden CL: **National Health and Nutrition Examination**  
467 **Survey: Analytic Guidelines, 1999-2010.** . *Vital Health Stat* 2013, **2**(161).
- 468 31. Lumley T: **Analysis of complex survey samples.** *Journal of Statistical Software* 2004, **9**(8):1-  
469 19.
- 470 32. Dey M, Gmel G, Mohler-Kuo M: **Body mass index and health-related quality of life among**  
471 **young Swiss men.** *BMC Public Health* 2013, **13**:1028.
- 472 33. Greenland S, Pearl J, Robins JM: **Causal diagrams for epidemiologic research.** *Epidemiology*  
473 1999, **10**(1):37-48.
- 474 34. Koenig W, Sund M, Frohlich M, Fischer HG, Lowel H, Doring A, Hutchinson WL, Pepys MB:  
475 **C-Reactive protein, a sensitive marker of inflammation, predicts future risk of coronary**  
476 **heart disease in initially healthy middle-aged men: results from the MONICA (Monitoring**  
477 **Trends and Determinants in Cardiovascular Disease) Augsburg Cohort Study, 1984 to**  
478 **1992.** *Circulation* 1999, **99**(2):237-242.
- 479 35. **US Department of Health and Human Services Code of Federal Regulations, Title 45**  
480 **(<http://www.hhs.gov/ohrp/humansubjects/guidance/45cfr46.html>).**
- 481

483 **TABLES**

484 **Table 1. Demographic and Medical Characteristics of Study Subjects.** Data is presented as mean(SD)  
 485 for continuous variables and as frequency(%) for categorical variables. The percent of data missing for  
 486 each variable is indicated. Inflammation-related variables are coded (as per NHANES 2005-2008) as  
 487 follows: SMQ040 (current smoking status), MCQ010 (medical diagnosis of asthma), MCQ220 (medical  
 488 diagnosis of cancer), MCQ160A (medical diagnosis of arthritis), Any heart disease (medical diagnosis  
 489 of one or more of heart attack, congestive heart failure or coronary heart disease)

| Variable                       | Mean (SD) or frequency (%) | % missing |
|--------------------------------|----------------------------|-----------|
| <b>Sample size = 6325</b>      |                            |           |
| Age (yrs.)                     | 51.30(17.85)               | 0         |
| Male                           | 48.96%                     | 0         |
| Race                           |                            |           |
| - Mexican American (1)         | 17.28%                     | 0         |
| - Other Hispanic (2)           | 11.38%                     | 0         |
| - Non-Hispanic White (3)       | 46.75%                     | 0         |
| - Non-Hispanic Black (4)       | 20.63%                     | 0         |
| - Other Race (Multiracial) (5) | 4.03%                      | 0         |
| HSQ470 (days)                  | 4.49(8.71)                 | 11.74     |
| HSQ480 (days)                  | 4.09(8.28)                 | 11.71     |
| BMI (kg/m <sup>2</sup> )       | 29.34(6.77)                | 5.66      |
| -normal weight(18.5-24.99)     | 27.1%                      |           |
| -overweight(25-29.99)          | 34.8%                      |           |
| -obese(≥30)                    | 38.0%                      |           |
| CRP(mg/dl)                     | 0.46(0.89)                 | 9.92      |
| -CRP.class 1 (<0.22)           | 51.3%                      |           |
| -CRP.class 2 (≥0.22-<1.0)      | 37.4%                      |           |
| -CRP.class 3 (≥1.0)            | 11.3%                      |           |
| SMQ040 (=1) [smoking]          | 21.97%                     | 52.29     |
| MCQ010 (=1) [asthma]           | 14.01%                     | 0.09      |
| MCQ220 (=1) [cancer]           | 10.12%                     | 0.17      |
| MCQ160A (=1) [arthritis]       | 32.21%                     | 0.16      |
| Any heart disease (=1)         | 9.38%                      | 0.01      |
| Anti-inflammatory drug use     | 13.72%                     | 38.02     |

490

491 **Table 2. Relationship of Physical and Mental Healthy Days to BMI and CRP levels. Results include**  
 492 *estimates of odds ratio (OR) and corresponding 95% confidence intervals under different models*  
 493 *indexed by varying dependent variables. The OR is interpreted as the relative changes in odds for*  
 494 *physical (HSQ470>15 days) or mental (HSQ480>15 days) unhealthy days upon changes in the*  
 495 *categories of the explanatory variables (BMI and/or CRP).*

| <b>Model</b>   | <b>Dependent Variable</b> | <b>Parameter</b> | <b>OR (95% CI)</b> |
|----------------|---------------------------|------------------|--------------------|
| <b>Model 1</b> | HSQ470                    | (Intercept)      | 0.06 (0.04,0.09)   |
|                |                           | overweight       | 1.06 (0.76,1.47)   |
|                |                           | obese            | 1.59 (1.15,2.21)   |
| <b>Model 2</b> | HSQ480                    | (Intercept)      | 0.06 (0.05,0.09)   |
|                |                           | overweight       | 1.20 (0.86,1.68)   |
|                |                           | obese            | 1.25 (0.89,1.75)   |
| <b>Model 3</b> | HSQ470                    | (Intercept)      | 0.06 (0.04,0.07)   |
|                |                           | CRP.class (2)    | 1.61 (1.23,2.12)   |
|                |                           | CRP.class (3)    | 2.45 (1.84,3.26)   |
| <b>Model 4</b> | HSQ480                    | (Intercept)      | 0.07 (0.05,0.09)   |
|                |                           | CRP.class (2)    | 1.05 (0.79,1.40)   |
|                |                           | CRP.class (3)    | 1.66 (1.26,2.19)   |
| <b>Model 5</b> | HSQ470                    | (Intercept)      | 0.05 (0.04,0.07)   |
|                |                           | overweight       | 0.98 (0.70,1.35)   |
|                |                           | obese            | 1.26 (0.92,1.74)   |
|                |                           | CRP.class (2)    | 1.51 (1.14,2.0)    |
|                |                           | CRP.class (3)    | 2.21(1.55,3.16)    |

496

497 **Table 2 Footnote:** *Data was analyzed using sampling weighted generalized linear models (logistic) as*  
 498 *described under Methods. Model specifications are as follows: Model 1, HSQ470 vs. BMI; Model 2,*  
 499 *HSQ480 vs. BMI; Model 3, HSQ470 vs. CRP; Model 4, HSQ480 vs. CRP; Model 5, HSQ470 vs. BMI*  
 500 *and CRP.*

501 **Table 3: Effect modification for outcome variable HSQ470.** The modification of the association  
 502 between physical healthy days (HSQ470) and BMI or CRP was investigated. Data was analyzed using  
 503 sampling weighted generalized linear models (logistic) as described under Methods.

| <b>Outcome Variable HSQ470</b>           |                          |                      |                   |
|------------------------------------------|--------------------------|----------------------|-------------------|
|                                          | OR (95% CI)              |                      | OR (95% CI)       |
| <b>Effect modification due to GENDER</b> |                          |                      |                   |
| (Intercept)                              | 0.06 (0.04, 0.09)        | (Intercept)          | 0.06 (0.04, 0.09) |
| Overweight                               | 1.60 (1.01, 2.54)        | CRP.class2           | 1.72 (1.18, 2.51) |
| Obese                                    | 1.96 (1.24, 3.11)        | CRP.class3           | 2.38 (1.61, 3.52) |
| GENDER1                                  | 1.26 (0.80, 1.99)        | GENDER1              | 0.92 (0.63, 1.33) |
| Overweight:GENDER1                       | <b>0.42 (0.26, 0.68)</b> | CRP.class2:GENDER1   | 0.83 (0.57, 1.20) |
| Obese:GENDER1                            | <b>0.62 (0.39, 0.99)</b> | CRP.class3:GENDER1   | 1.03 (0.70, 1.51) |
| <b>Effect modification due to AGE</b>    |                          |                      |                   |
| (Intercept)                              | 0.03 (0.02, 0.06)        | (Intercept)          | 0.03 (0.02, 0.05) |
| Overweight                               | 1.16 (0.64, 2.12)        | CRP.class2           | 1.72 (1.03, 2.89) |
| Obese                                    | 1.64 (0.90, 3.01)        | CRP.class3           | 2.16 (1.28, 3.63) |
| AGEclass2                                | 2.68 (1.47, 4.89)        | AGEclass2            | 2.67 (1.60, 4.45) |
| AGEclass3                                | 3.40 (1.86, 6.21)        | AGEclass3            | 2.53 (1.51, 4.24) |
| Overweight:AGEclass2                     | 0.79 (0.43, 1.45)        | CRP.class2:AGEclass2 | 0.79 (0.47, 1.33) |
| Obese:AGEclass2                          | 0.89 (0.49, 1.63)        | CRP.class3:AGEclass2 | 0.89 (0.53, 1.51) |
| Overweight:AGEclass3                     | 0.78 (0.43, 1.44)        | CRP.class2:AGEclass3 | 1.01 (0.60, 1.70) |
| Obese:AGEclass3                          | 0.82 (0.45, 1.50)        | CRP.class3:AGEclass3 | 1.57 (0.93, 2.66) |
| <b>Effect modification due to Race</b>   |                          |                      |                   |
| (Intercept)                              | 0.05 (0.02, 0.09)        | (Intercept)          | 0.05 (0.03, 0.09) |

|                  |                   |                  |                                  |
|------------------|-------------------|------------------|----------------------------------|
|                  | 0.11)             |                  | 504                              |
| Overweight       | 1.05 (0.48, 2.30) | CRP.class2       | 1.22 (0.66, 2.23) <sup>505</sup> |
| Obese            | 1.42 (0.65, 3.12) | CRP.class3       | 2.23 (1.23, 4.06) <sup>506</sup> |
| Race2            | 1.22 (0.56, 2.67) | Race2            | 1.40 (0.77, 2.55) <sup>507</sup> |
| Race3            | 1.32 (0.60, 2.88) | Race3            | 1.20 (0.66, 2.15) <sup>508</sup> |
| Race4            | 1.05 (0.48, 2.31) | Race4            | 1.20 (0.66, 2.15) <sup>509</sup> |
| Race5            | 0.92 (0.42, 2.02) | Race5            | 0.63 (0.33, 1.22) <sup>510</sup> |
| Overweight:Race2 | 1.53 (0.70, 3.37) | CRP.class2:Race2 | 1.00 (0.54, 1.85) <sup>511</sup> |
| Obese:Race2      | 0.97 (0.44, 2.14) | CRP.class3:Race2 | 1.15 (0.60, 2.21) <sup>512</sup> |
| Overweight:Race3 | 1.02 (0.46, 2.24) | CRP.class2:Race3 | 1.47 (0.79, 2.73) <sup>513</sup> |
| Obese:Race3      | 1.17 (0.54, 2.58) | CRP.class3:Race3 | 1.20 (0.65, 2.19) <sup>514</sup> |
| Overweight:Race4 | 0.95 (0.43, 2.09) | CRP.class2:Race4 | 0.96 (0.50, 1.83) <sup>515</sup> |
| Obese:Race4      | 1.09 (0.50, 2.40) | CRP.class3:Race4 | 0.63 (0.35, 1.15) <sup>516</sup> |
| Overweight:Race5 | 0.30 (0.14, 0.67) | CRP.class2:Race5 | 0.91 (0.33, 2.51) <sup>517</sup> |
| Obese:Race5      | 0.58 (0.26, 1.29) | CRP.class3:Race5 | 1.11 (0.37, 3.37) <sup>518</sup> |

519

520

521

522 **Table 4: Sensitivity Analysis with respect to different cut-off values of HSQ470 vs BMI and CRP.**  
 523 *The threshold for physical unhealthy days was varied from 12-18 days and the effects on the*  
 524 *association to BMI or CRP classes was evaluated (upper and lower panels of table, respectively).*  
 525 *Data was analyzed by sampling weighted generalized linear models as described under Methods.*

|                   | OR (95% CI) (outcome variable HSQ470 vs BMI Class) |                                   |                                   |                                   |                                   |                                  |
|-------------------|----------------------------------------------------|-----------------------------------|-----------------------------------|-----------------------------------|-----------------------------------|----------------------------------|
| Cut-off of HSQ470 | 12                                                 | 13                                | 14                                | 16                                | 17                                | 18                               |
| Intercept         | 0.08<br>(0.06,0.11)                                | 0.08<br>(0.06,0.11)               | 0.07<br>(0.05,0.1)                | 0.06<br>(0.04,0.08)               | 0.06<br>(0.04,0.08)               | 0.06<br>(0.04,0.08)              |
| Overweight        | 1.21<br>(0.91,1.59)                                | 1.19<br>(0.9,1.58)                | 1.2<br>(0.89,1.61)                | 1.03<br>(0.74,1.43)               | 1.02<br>(0.73,1.42)               | 1.02<br>(0.73,1.42)              |
| Obese             | <b>1.69</b><br><b>(1.27,2.23)</b>                  | <b>1.7</b><br><b>(1.28,2.25)</b>  | <b>1.66</b><br><b>(1.23,2.23)</b> | <b>1.6</b><br><b>(1.15,2.23)</b>  | <b>1.58</b><br><b>(1.13,2.2)</b>  | <b>1.54</b><br><b>(1.1,2.15)</b> |
|                   | OR (95% CI) (outcome variable HSQ470 vs CRP Class) |                                   |                                   |                                   |                                   |                                  |
| Cut-off of HSQ470 | 12                                                 | 13                                | 14                                | 16                                | 17                                | 18                               |
| Intercept         | 0.08<br>(0.06,0.1)                                 | 0.08<br>(0.06,0.1)                | 0.07<br>(0.05,0.09)               | 0.05<br>(0.04,0.07)               | 0.05<br>(0.04,0.07)               | 0.05<br>(0.04,0.07)              |
| CRP.Class2        | <b>1.54</b><br><b>(1.22,1.96)</b>                  | <b>1.53</b><br><b>(1.2,1.93)</b>  | <b>1.55</b><br><b>(1.21,1.98)</b> | <b>1.7</b><br><b>(1.29,2.24)</b>  | <b>1.7</b><br><b>(1.28,2.24)</b>  | <b>1.73</b><br><b>(1.3,2.28)</b> |
| CRP.Class3        | <b>2.34</b><br><b>(1.83,2.99)</b>                  | <b>2.36</b><br><b>(1.84,3.03)</b> | <b>2.46</b><br><b>(1.89,3.2)</b>  | <b>2.59</b><br><b>(1.94,3.45)</b> | <b>2.64</b><br><b>(1.97,3.54)</b> | <b>2.7</b><br><b>(2.01,3.62)</b> |

526

527

528 **Table 5: Multivariable logistic regression analysis of the association of CRP to physical unhealthy**  
529 **days. Results include estimates of odds ratio (OR) and corresponding 95% confidence intervals. The**  
530 **OR is interpreted as the increase in odds for physical (HSQ470>15 days) unhealthy days upon changes**  
531 **in the categories of the explanatory variables. Data was analyzed using sampling weighted generalized**  
532 **linear models (logistic) as described under Methods.**

533

534

| <b>Parameter</b>               | <b>OR (95% CI)</b> |
|--------------------------------|--------------------|
| (Intercept)                    | 0.02 (0.01, 0.04)  |
| Overweight                     | 0.93 (0.66, 1.30)  |
| Obese                          | 1.08 (0.76, 1.52)  |
| CRP.class (2)                  | 1.36 (1.02, 1.82)  |
| CRP.class (3)                  | 1.75 (1.21, 2.54)  |
| Anti-inflammatory Drug Use (1) | 2.42 (1.76, 3.35)  |
| AGEclass (2)                   | 1.83 (1.31, 2.57)  |
| AGEclass (3)                   | 1.67 (1.11, 2.50)  |
| MCQ010 (1)                     | 1.37 (1.01, 1.85)  |
| MCQ220 (1)                     | 1.36 (0.95, 1.94)  |
| MCQ160A (1)                    | 2.33 (1.72, 3.14)  |
| GENDER (1)                     | 0.89 (0.69, 1.16)  |
| SMQ040 (1)                     | 1.16 (0.84, 1.61)  |
| Any Heart Disease (1)          | 1.65 (1.15, 2.35)  |

540

541
